# Supplementary material
Source: bioRxiv or medRxiv preprint supplement (http://medrxiv.stage.highwire.org/highwire/filestream/76272/field_highwire_adjunct_files/0/2020.04.07.20054767-1.pdf)
Supplement: Supplementary file [file 2020.04.07.20054767-1.pdf]

**Figure S1.** Computed Tomography (CT)-based radiographs for each included patient with COVID-19 in the  $^{99\text{m}}\text{Tc}$ -MDP and control groups. For those who discharged during 7 days to 14 days, there is no CT radiograph at day 14.

## Patient 1 $^{99m}\text{Tc}$ -MDP group

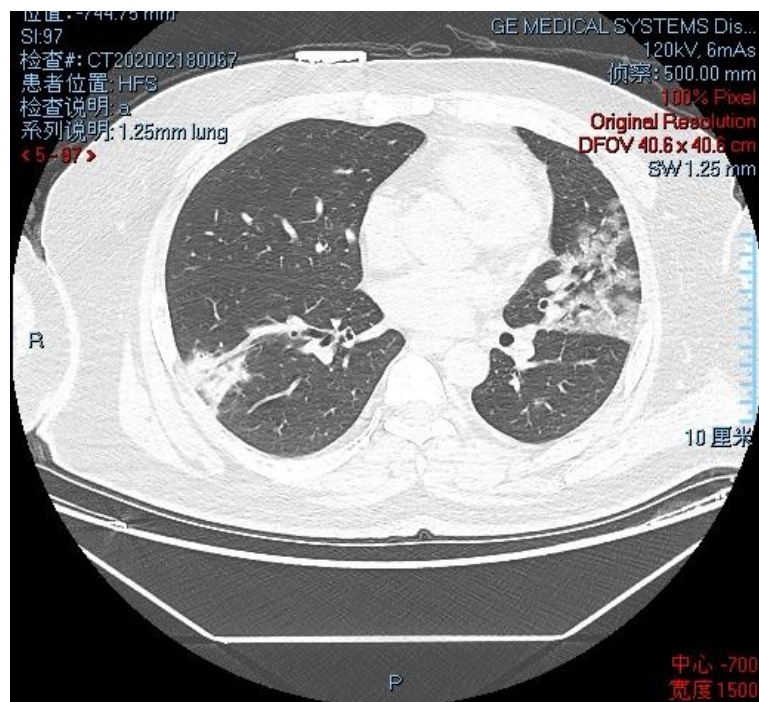

At admission

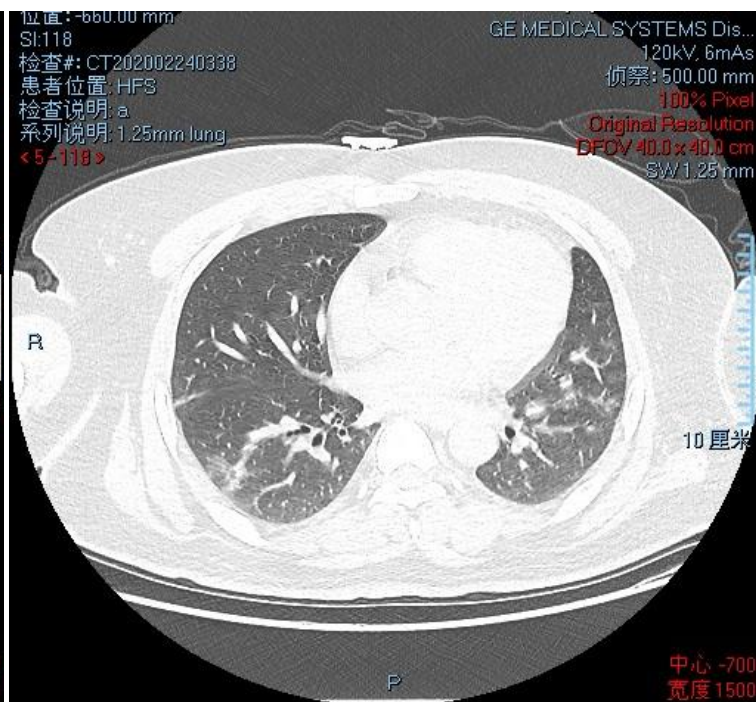

At 7 day

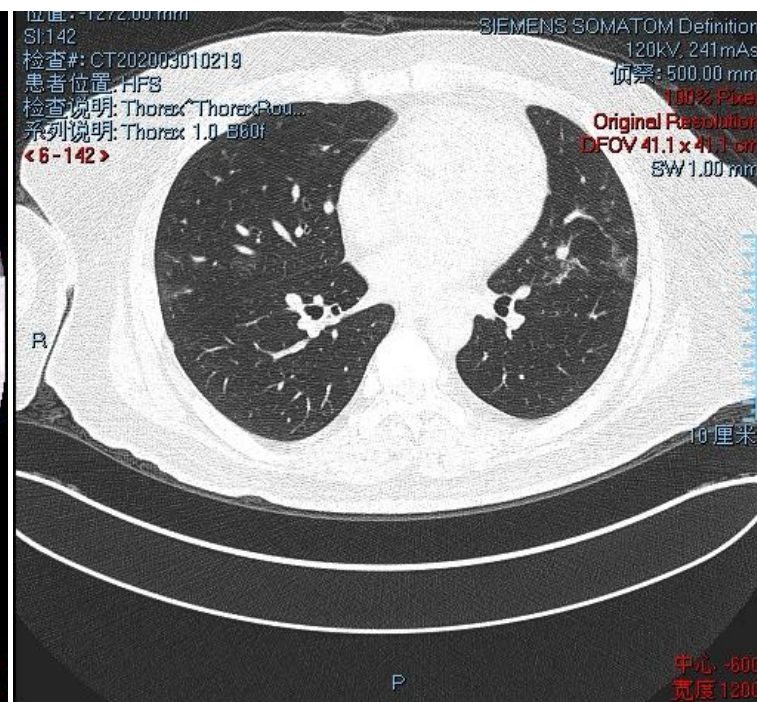

At 14 day

## Patient 2 $^{99m}\text{Tc}$ -MDP group

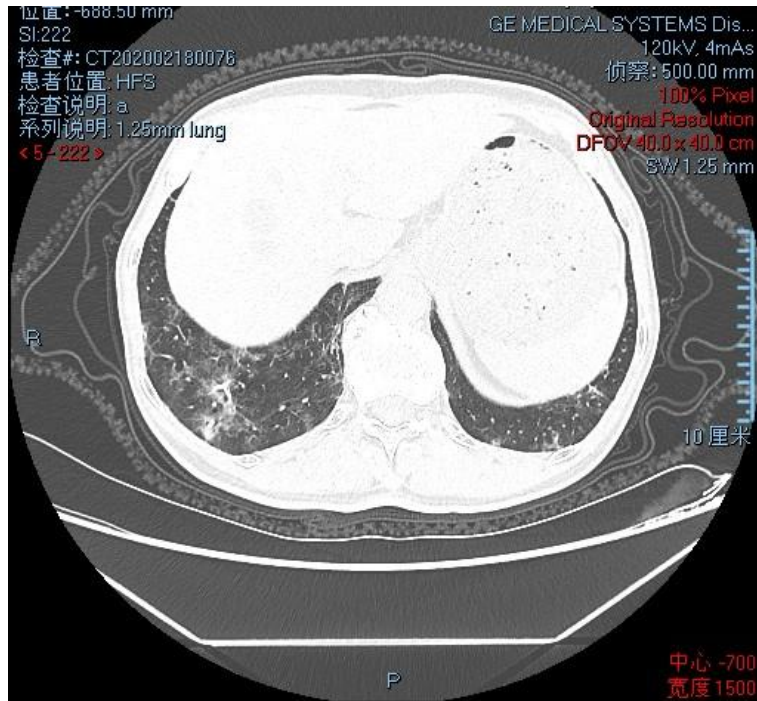

At admission

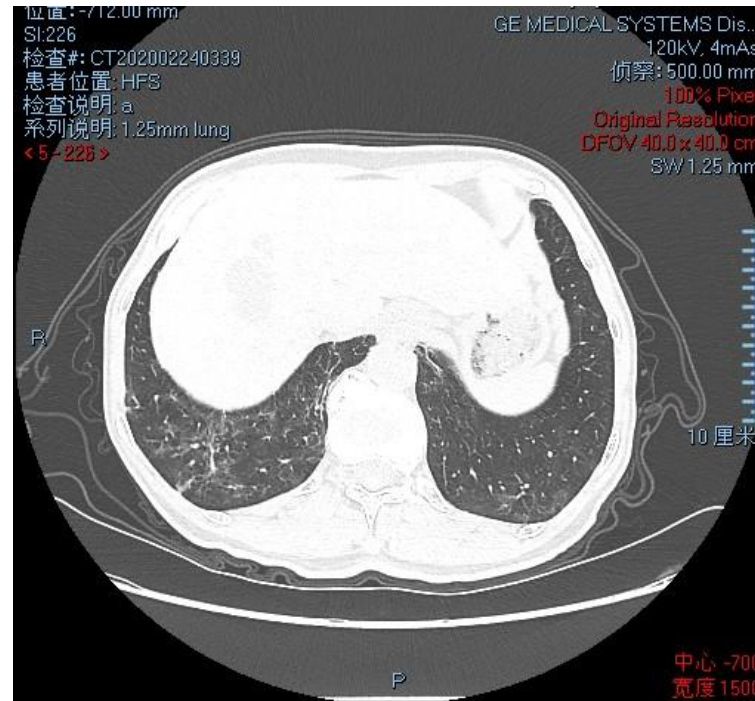

At 7 day



## Patient 3 $^{99m}\text{Tc}$ -MDP group

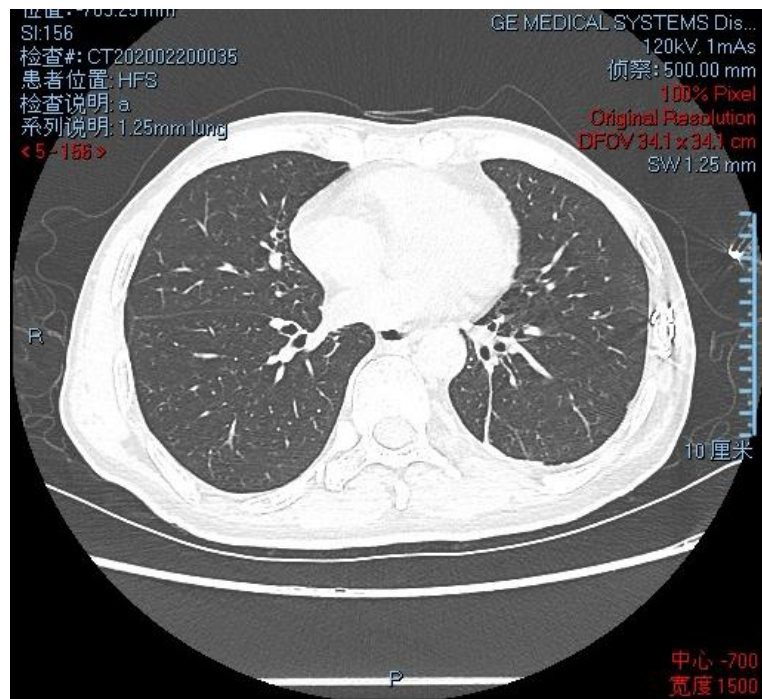

At admission

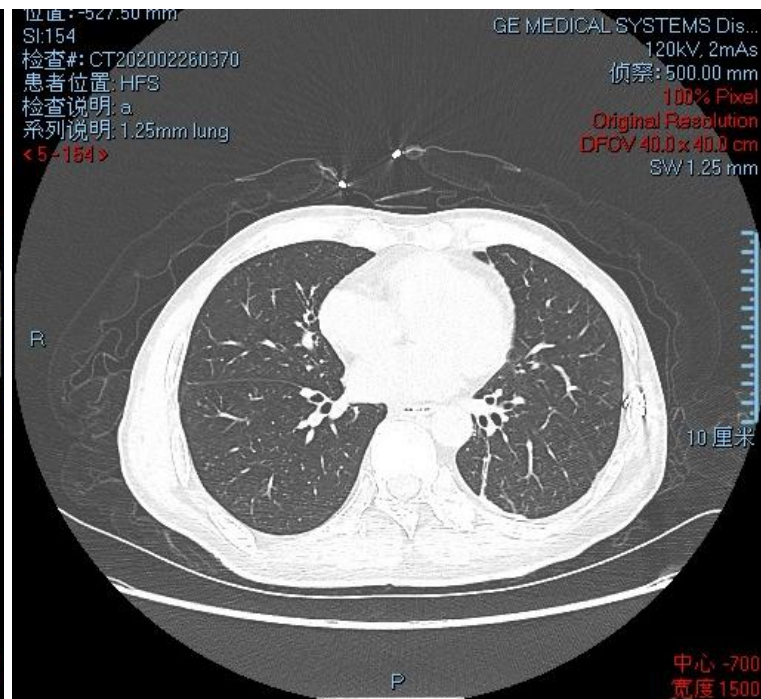

At 7 day

## Patient 4 $^{99m}\text{Tc}$ -MDP group

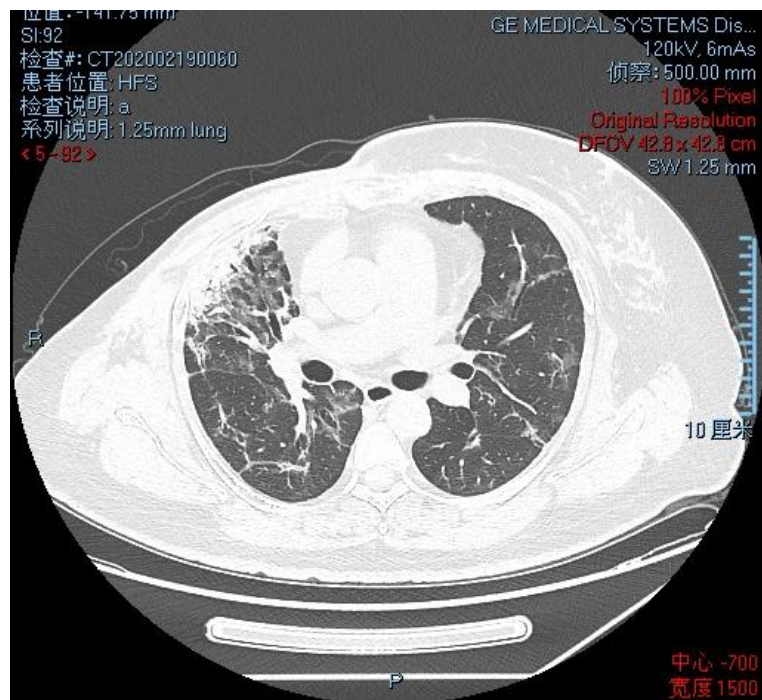

At admission

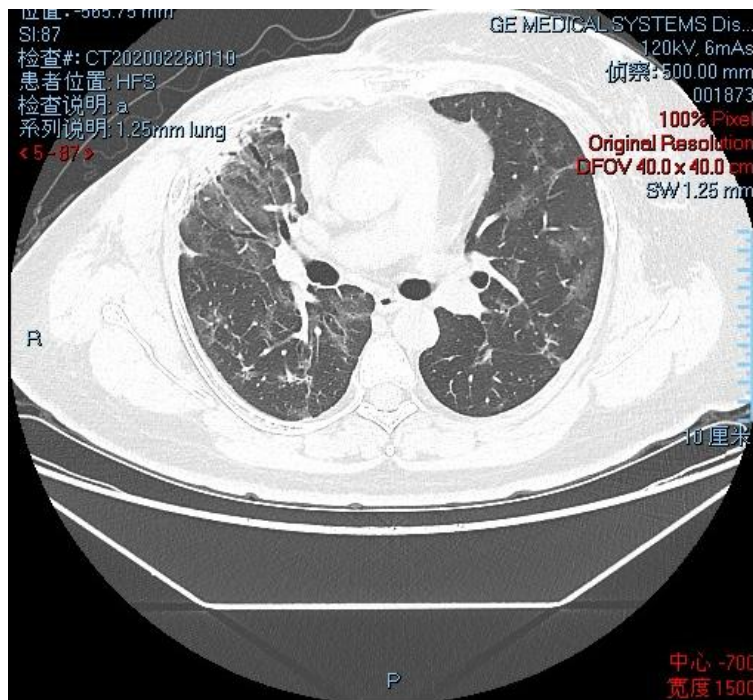

At 7 day

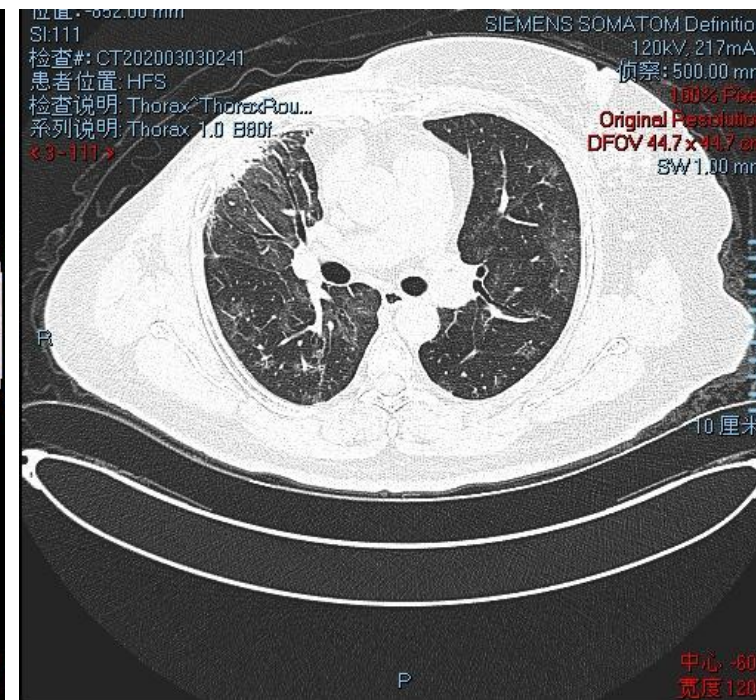

At 14 day



## Patient 5 $^{99m}\text{Tc}$ -MDP group

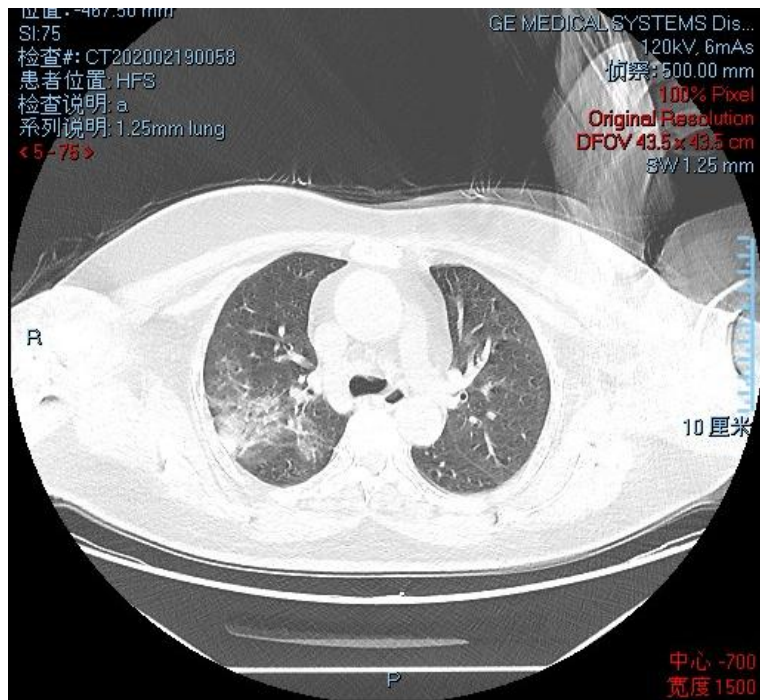

At admission

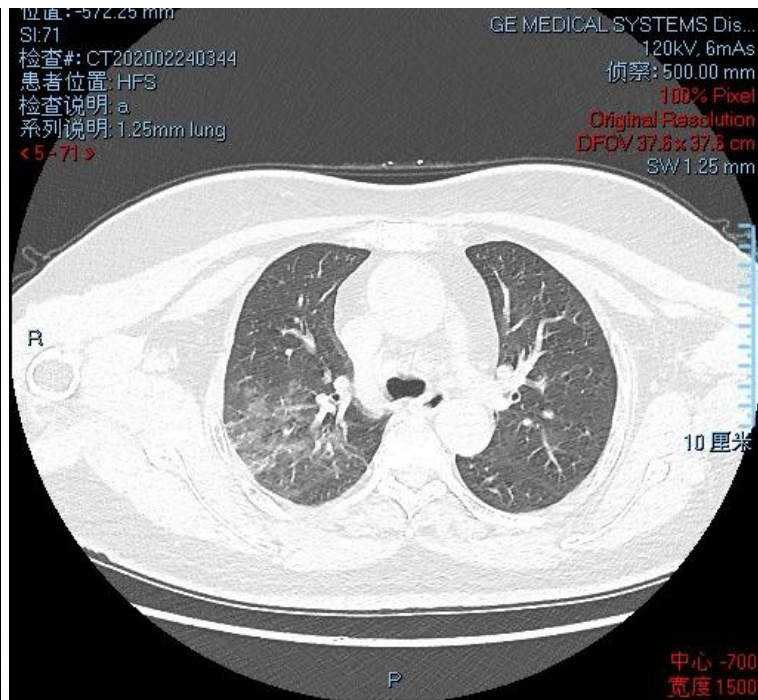

At 7 day

## Patient 6 $^{99m}\text{Tc}$ -MDP group

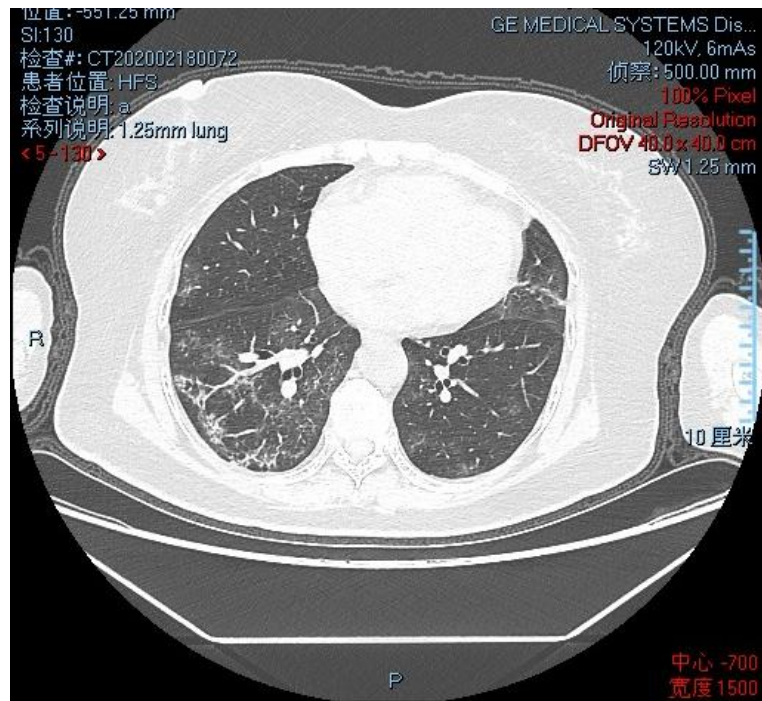

At admission

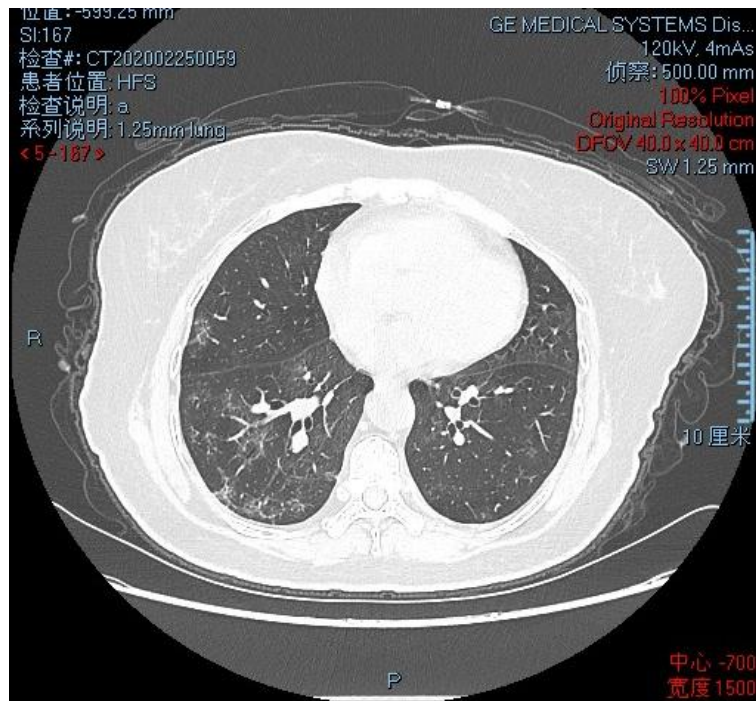

At 7 day



## Patient 7 $^{99m}\text{Tc}$ -MDP group

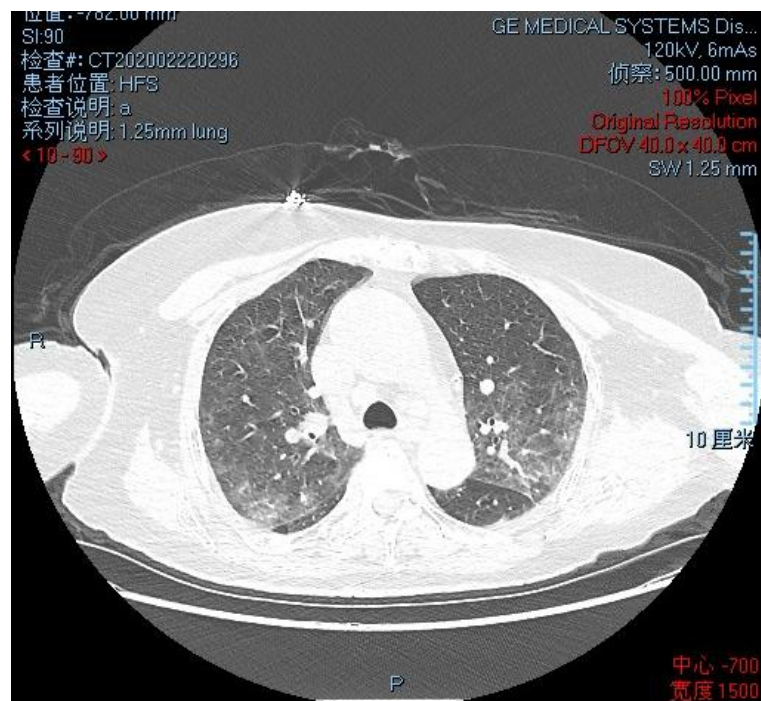

At admission

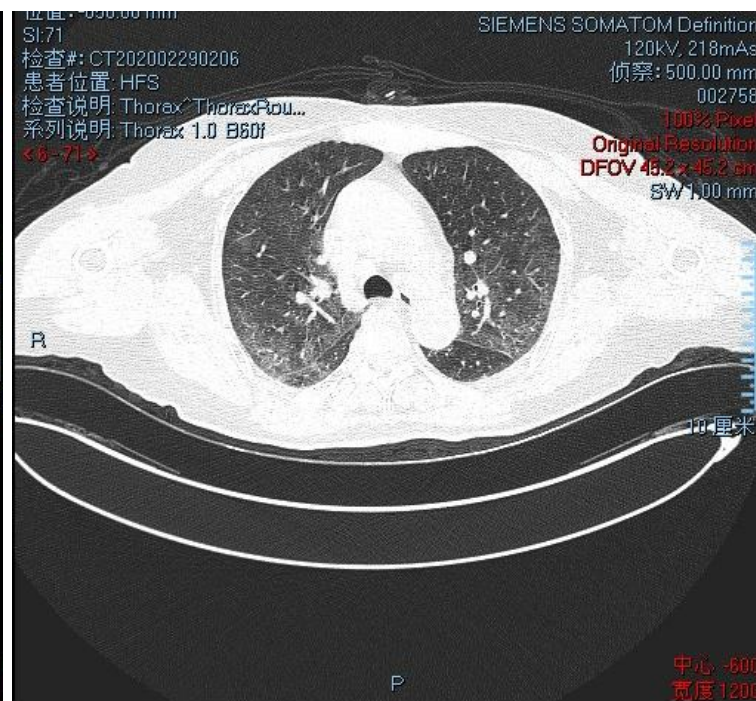

At 7 day

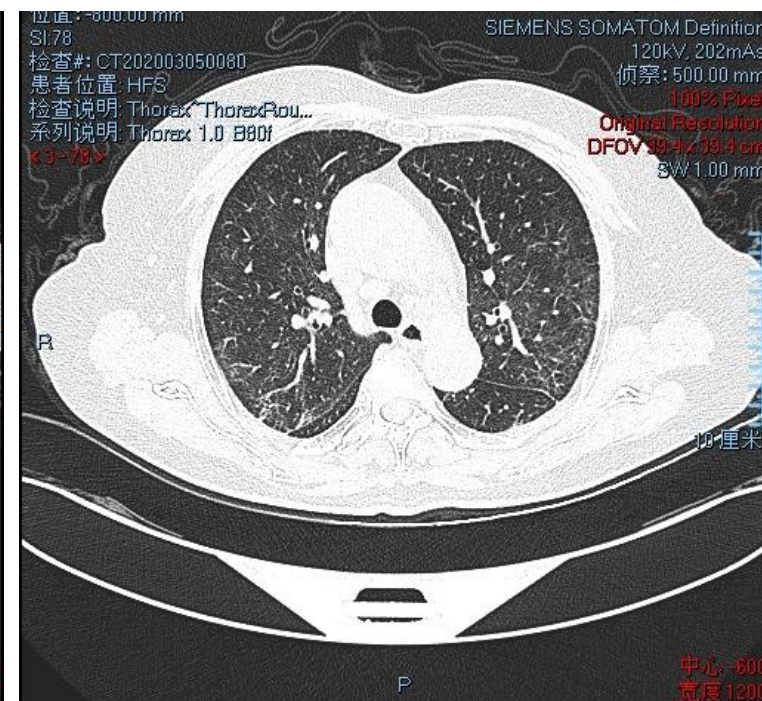

At 14 day



## Patient 8 $^{99m}\text{Tc}$ -MDP group

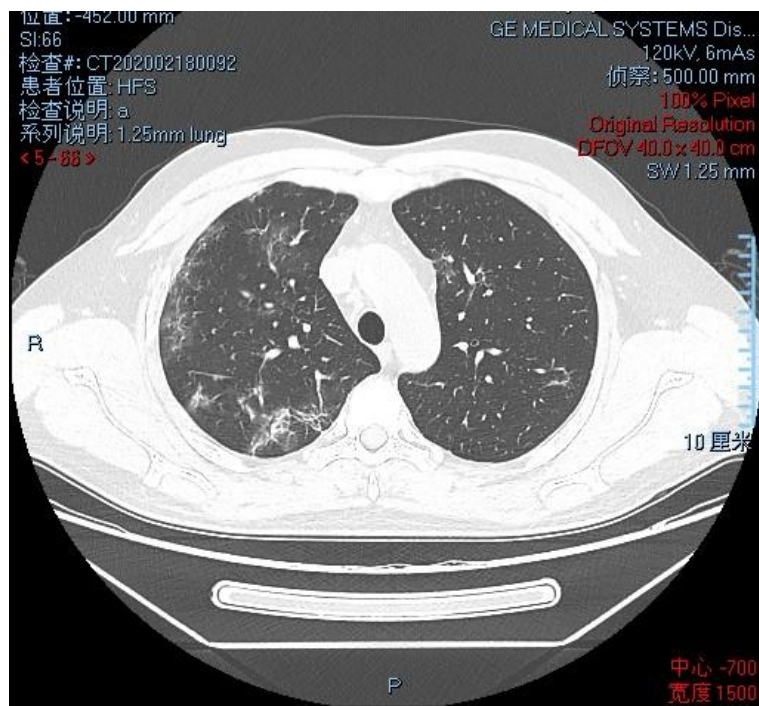

At admission

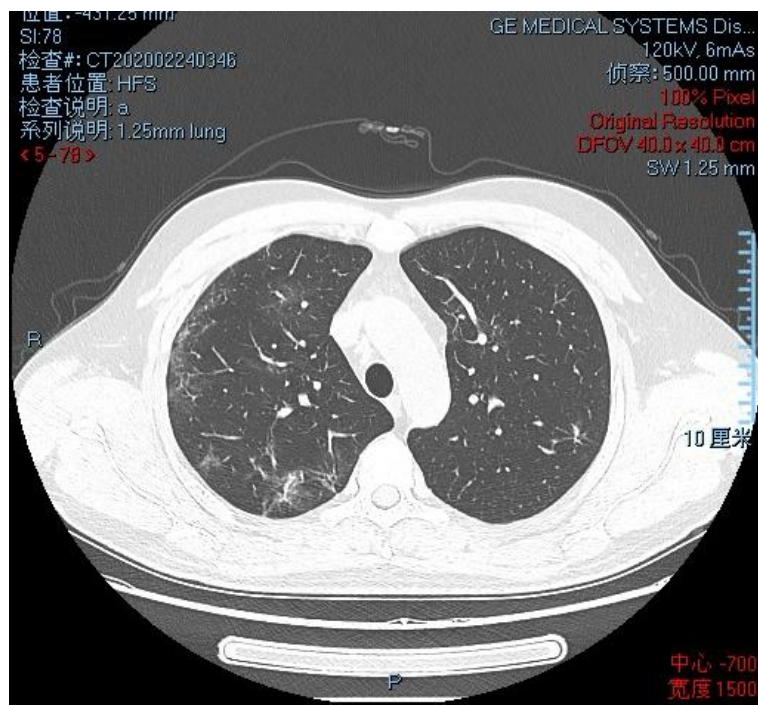

At 7 day

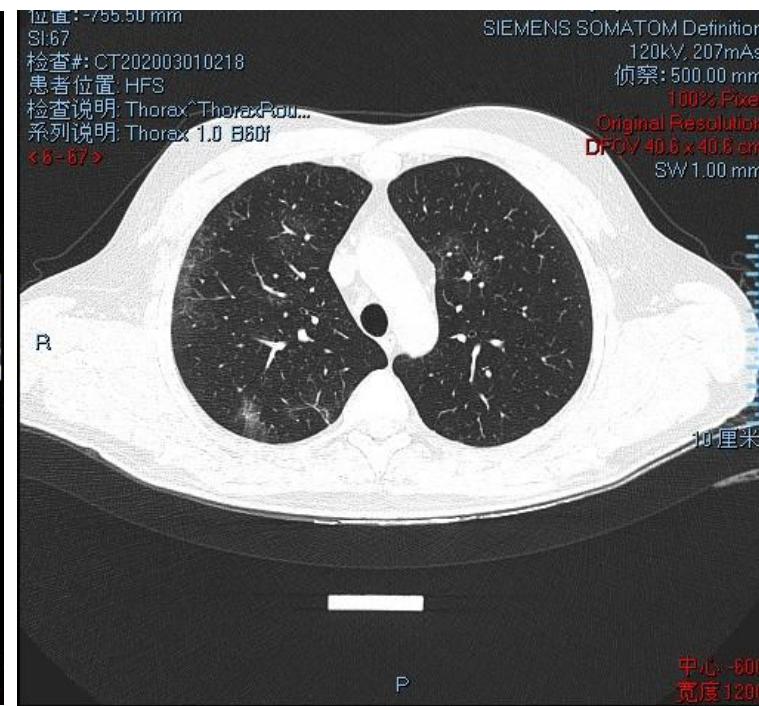

At 14 day

## Patient 9 $^{99m}\text{Tc}$ -MDP group

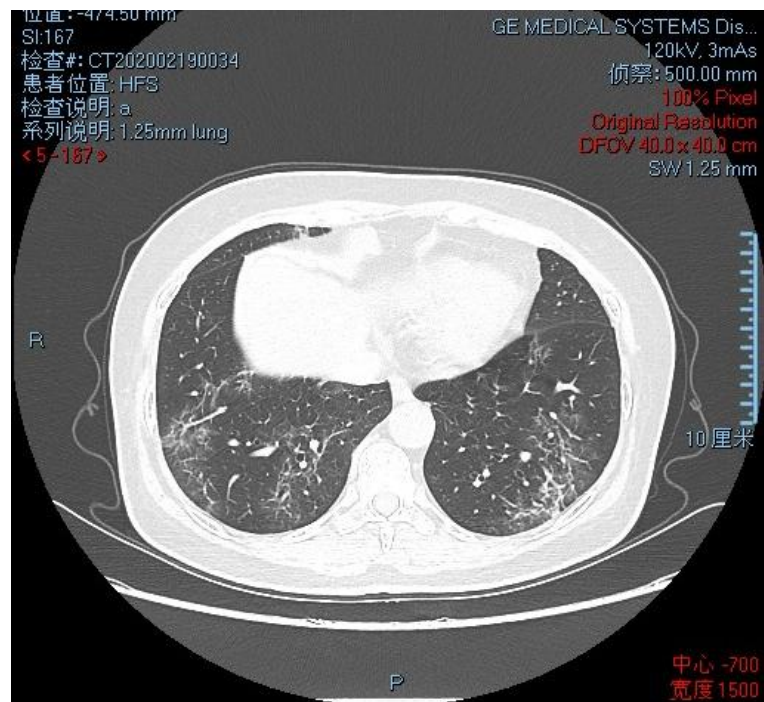

At admission

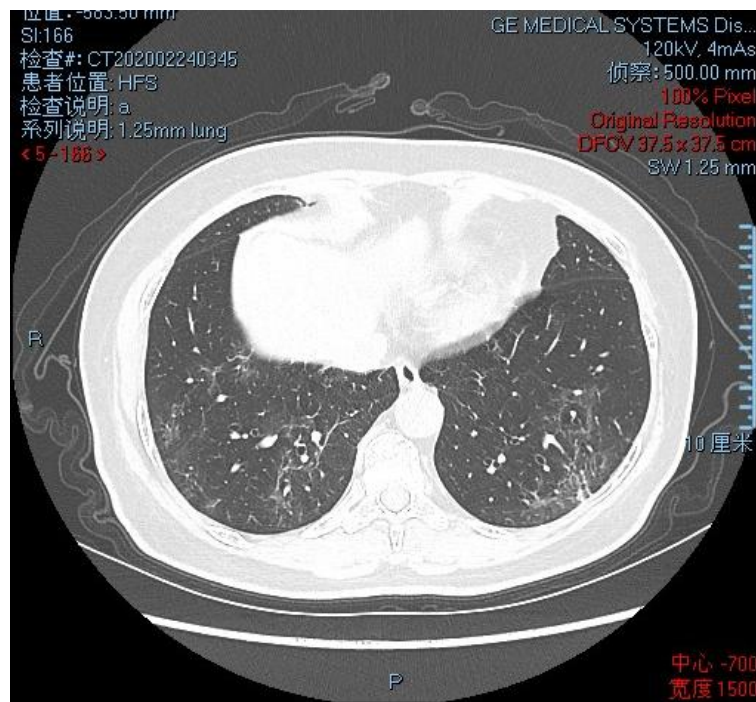

At 7 day

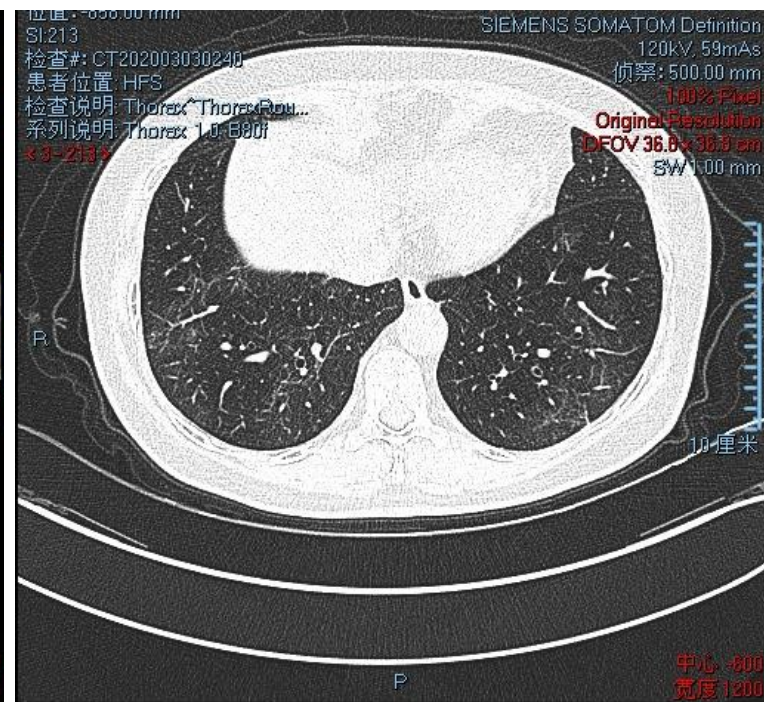

At 14 day



## Patient 10 Control group

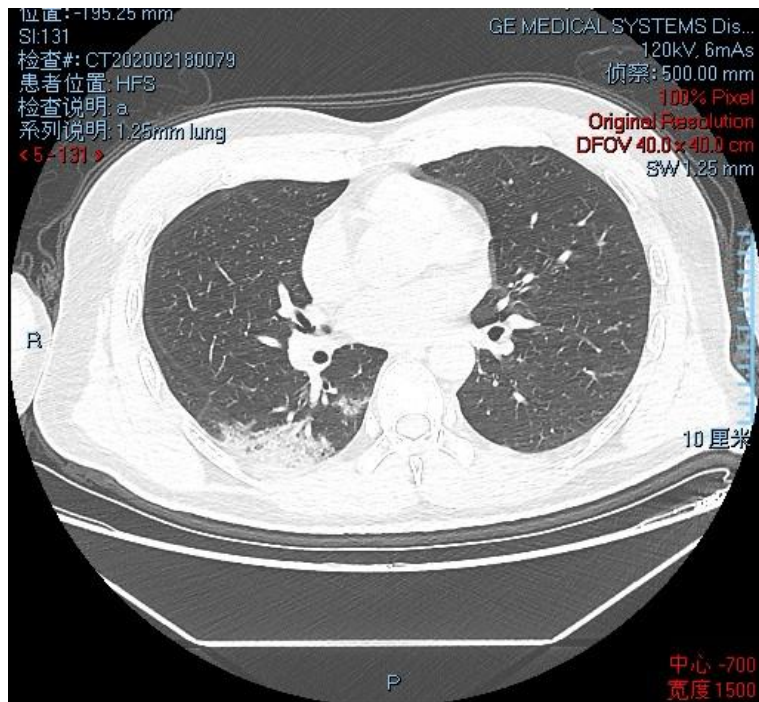

At admission

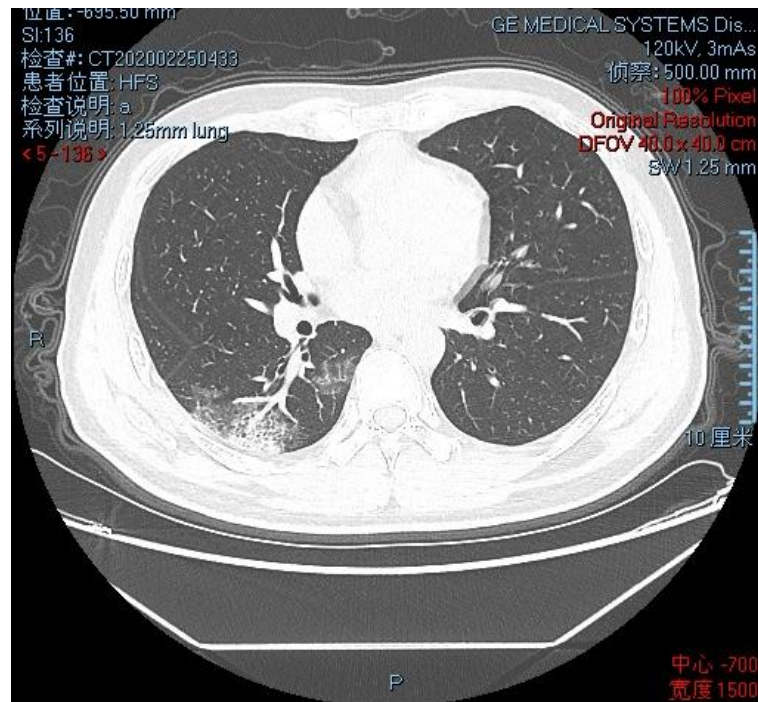

At 7 day

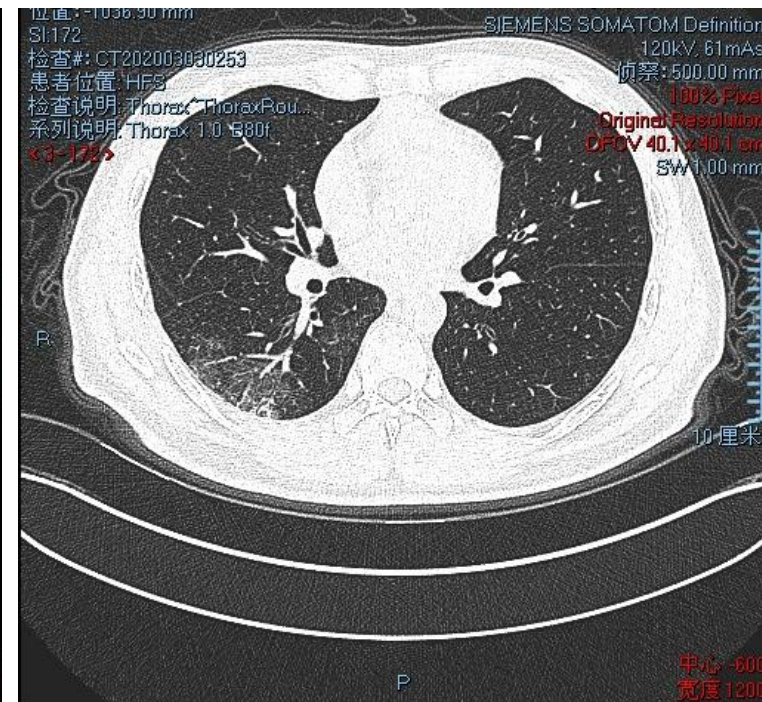

At 14 day



## Patient 11 Control group

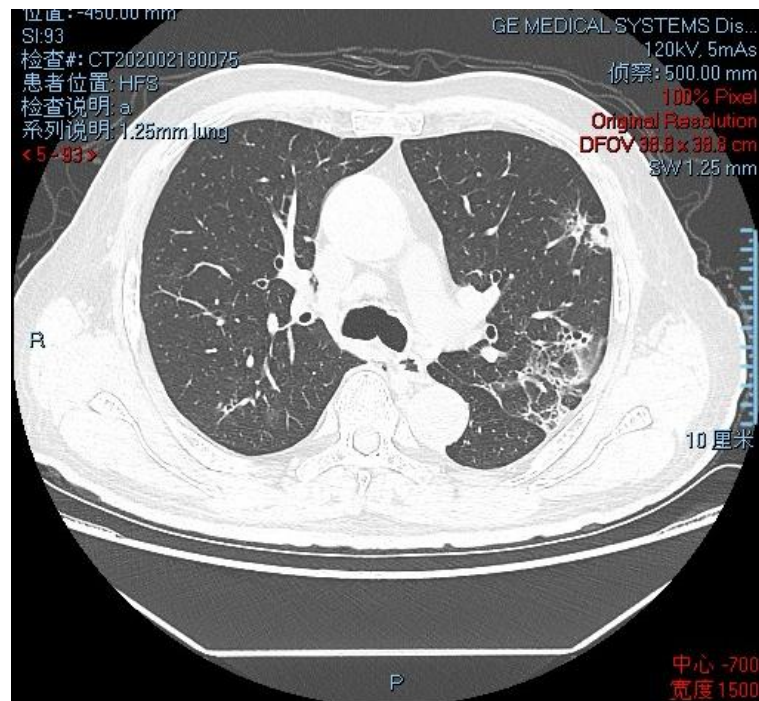

At admission

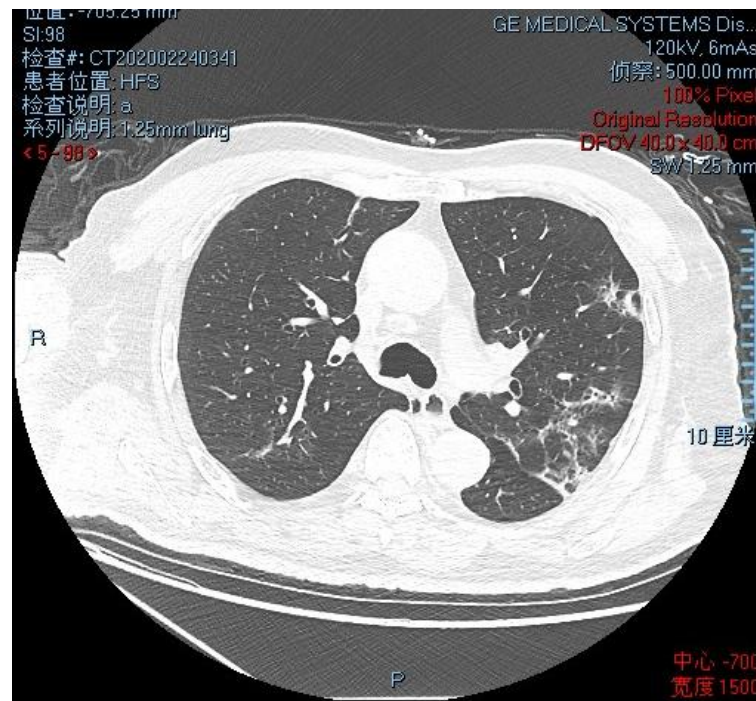

At 7 day

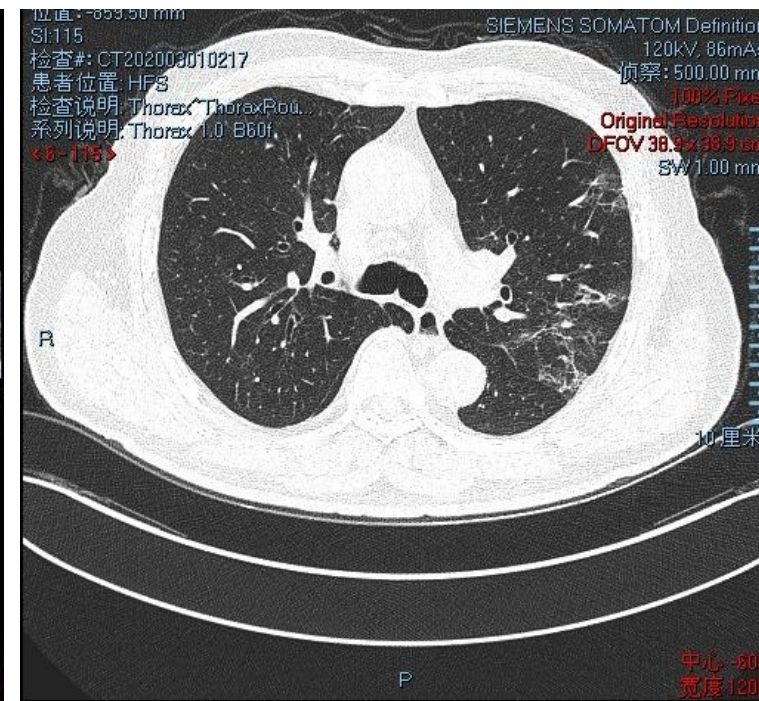

At 14 day



## Patient 12 Control group

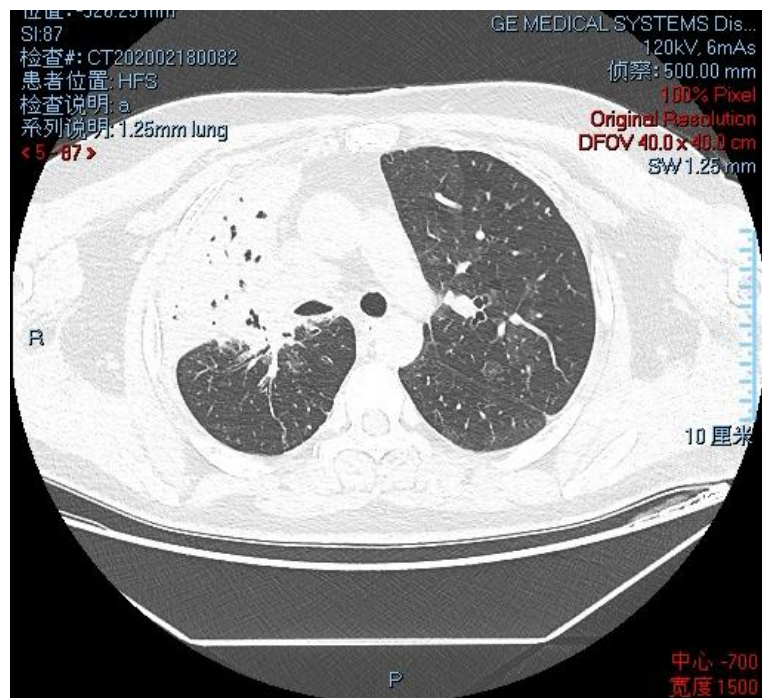

At admission

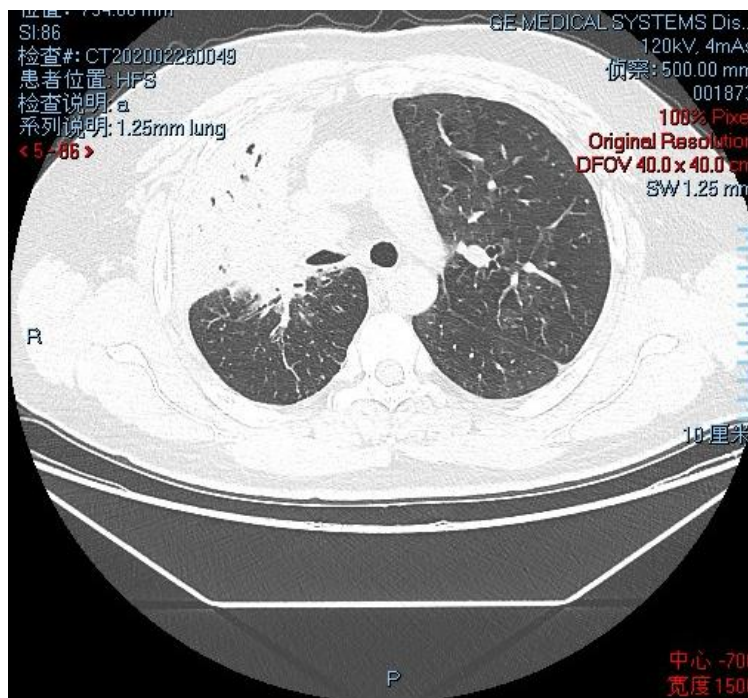

At 7 day

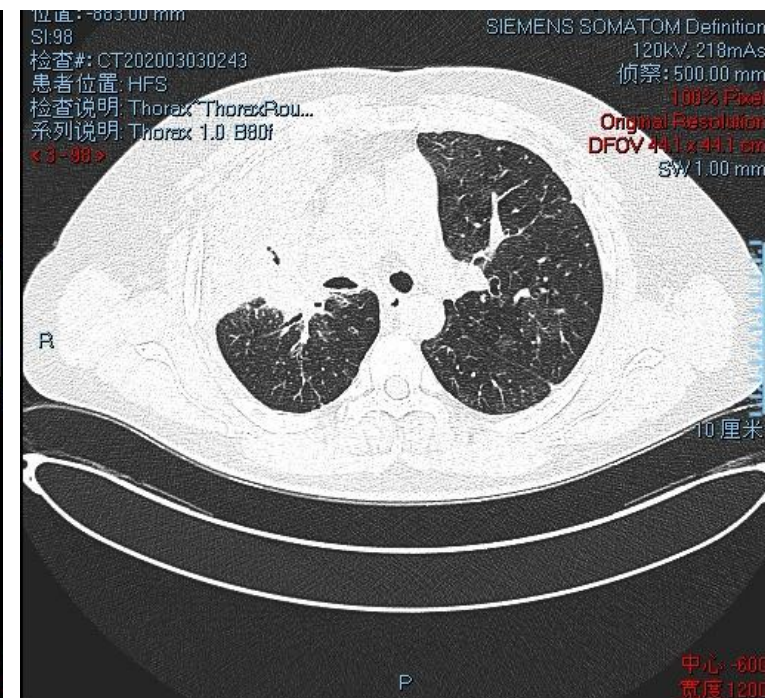

At 14 day

## Patient 13 Control group

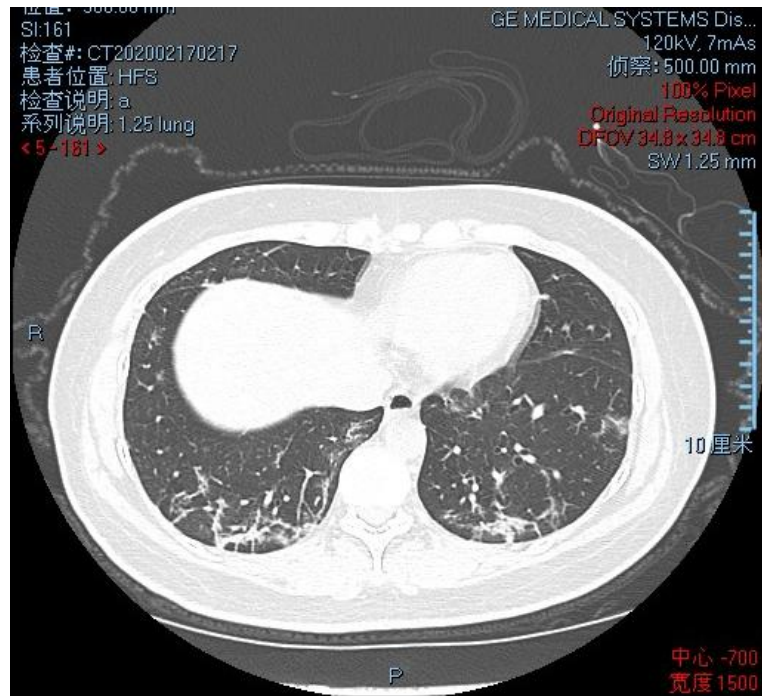

At admission

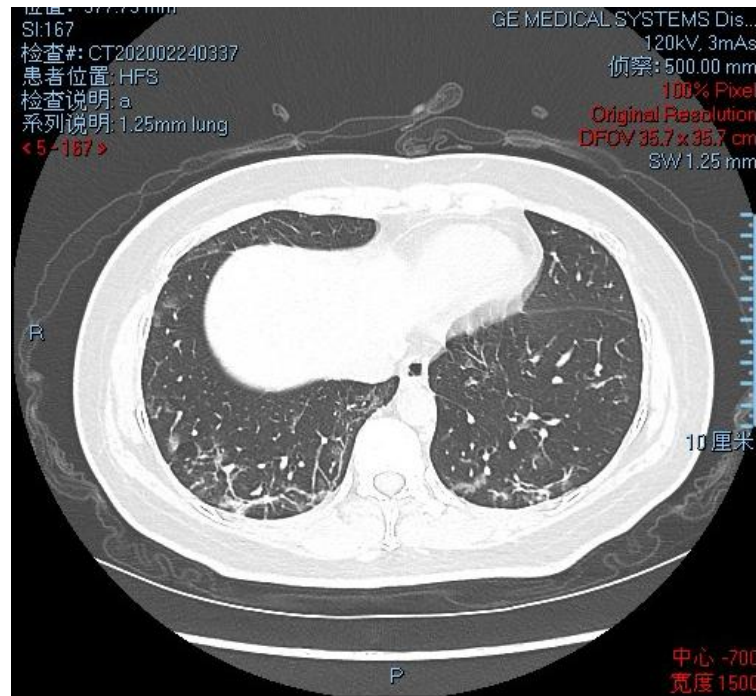

At 7 day



## Patient 14 Control group

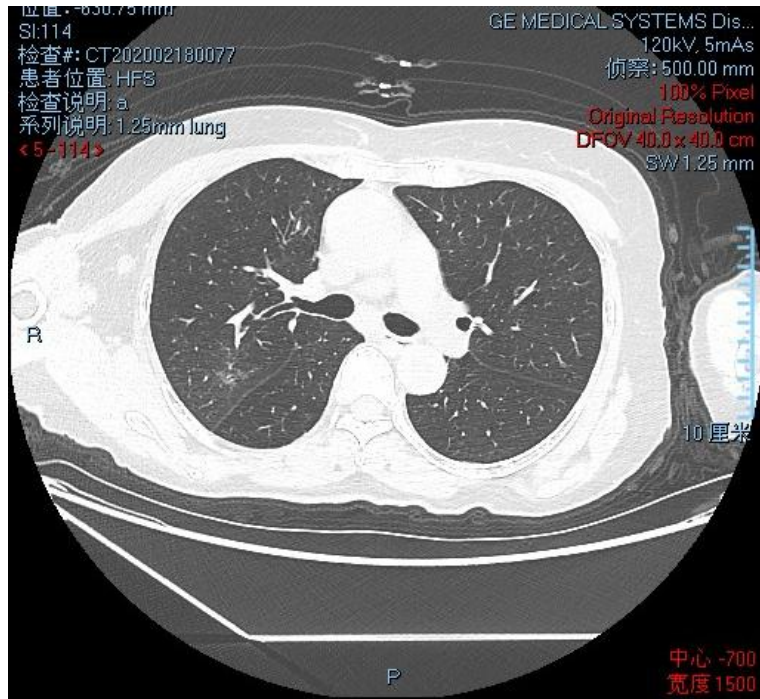

At admission

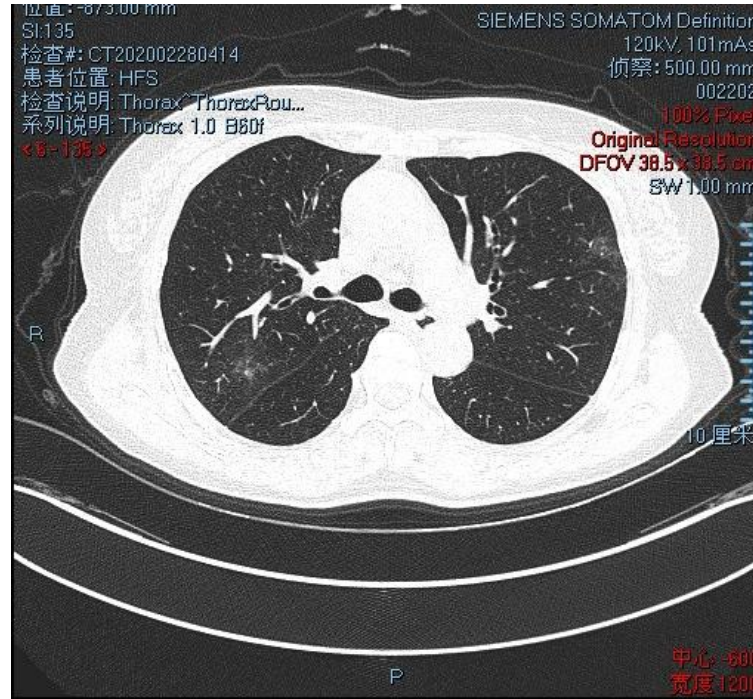

At 7 day

## Patient 15 Control group

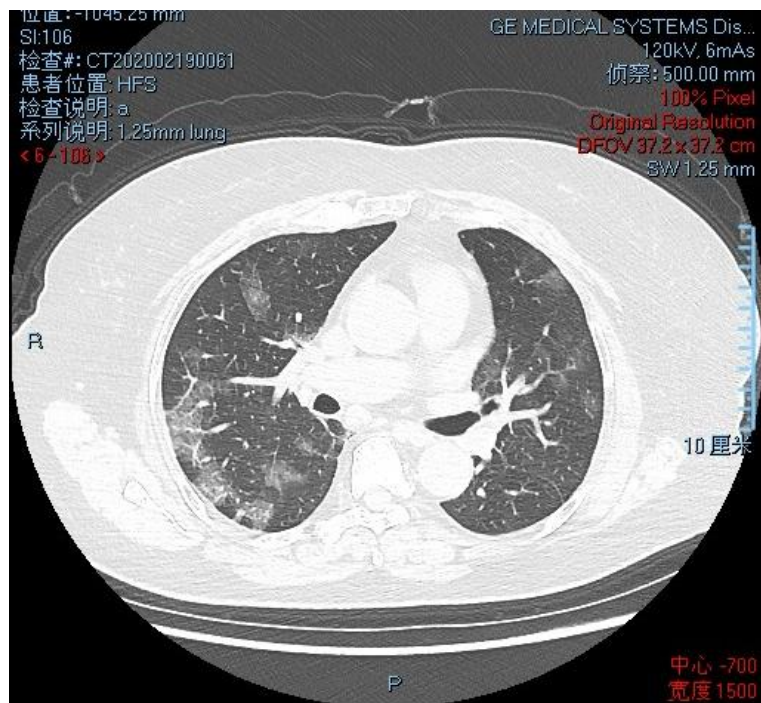

At admission

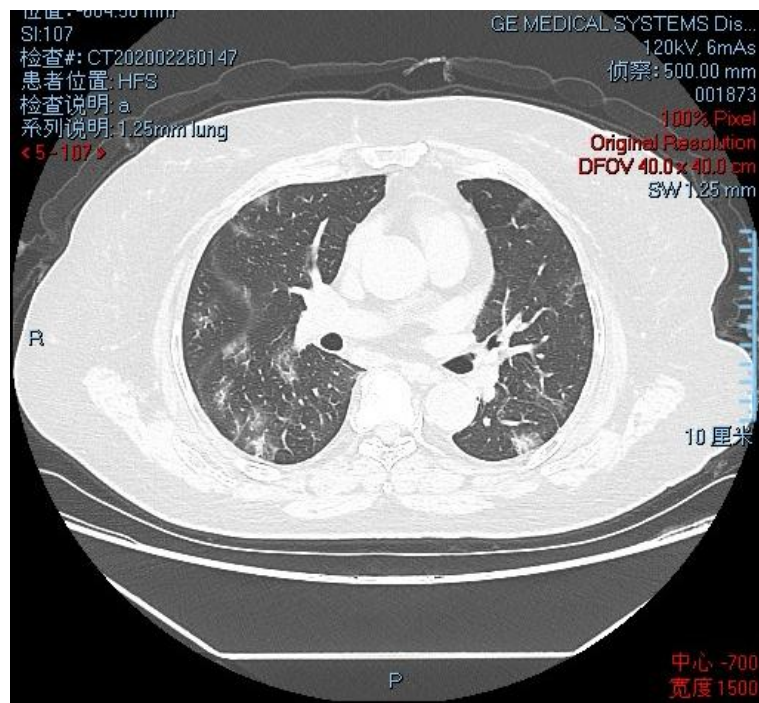

At 7 day

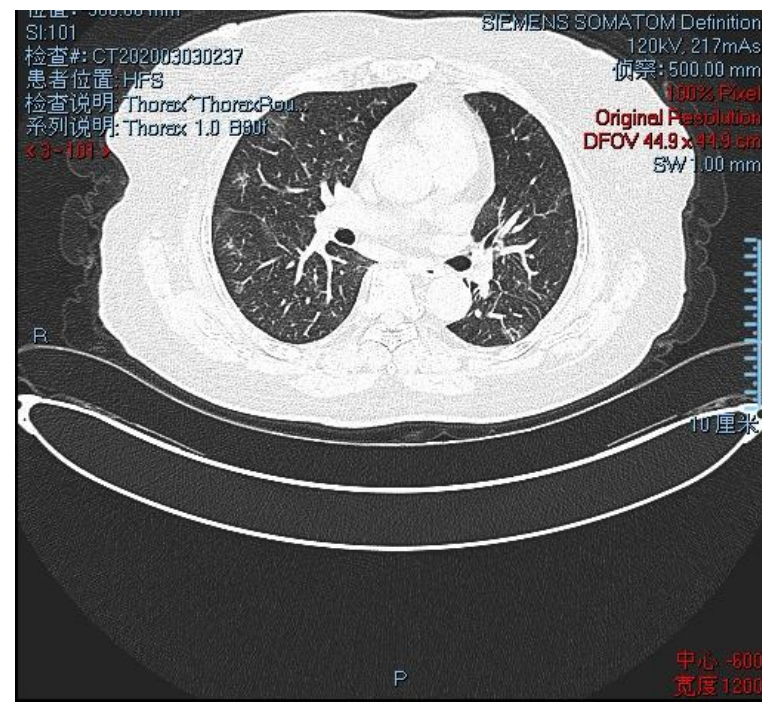

At 14 day



## Patient 16 Control group

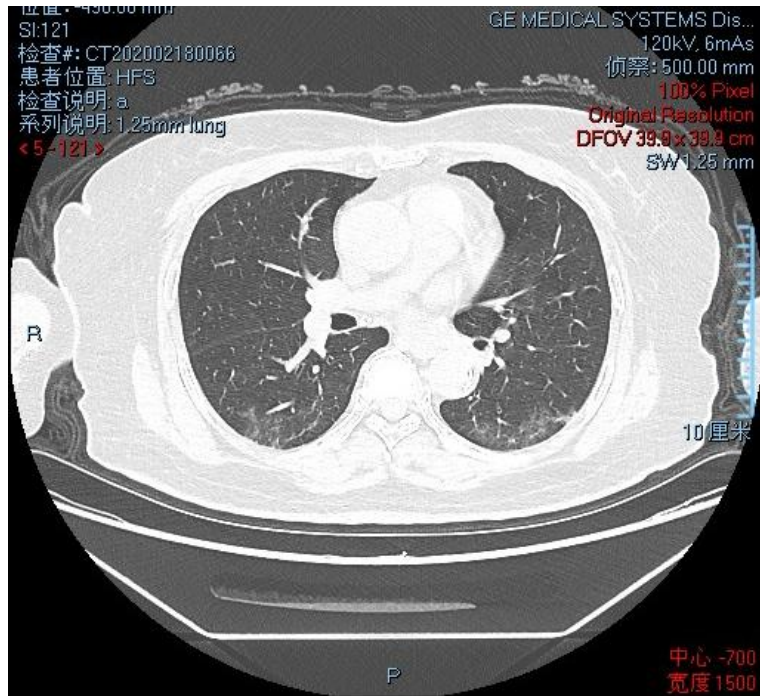

At admission

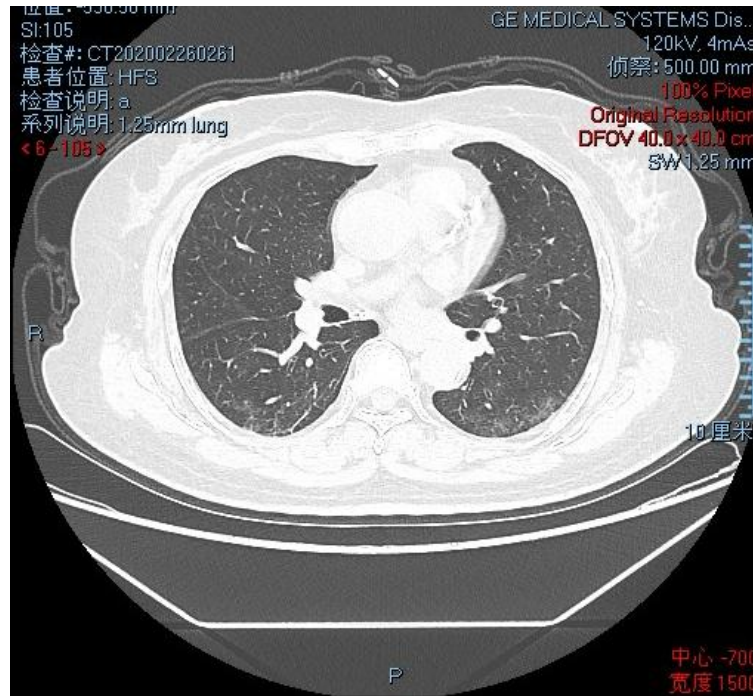

At 7 day

## Patient 17 $^{99m}\text{Tc}$ -MDP group

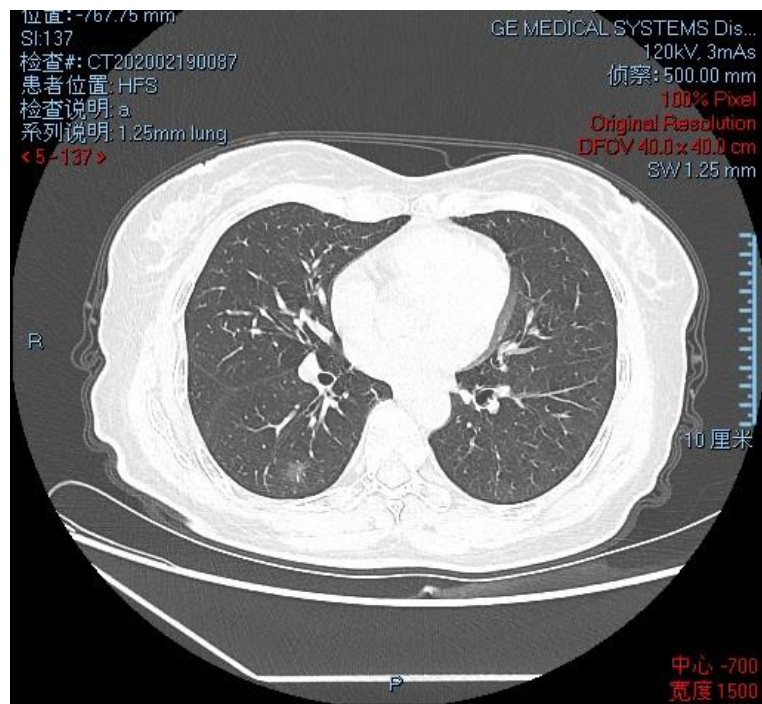

At admission

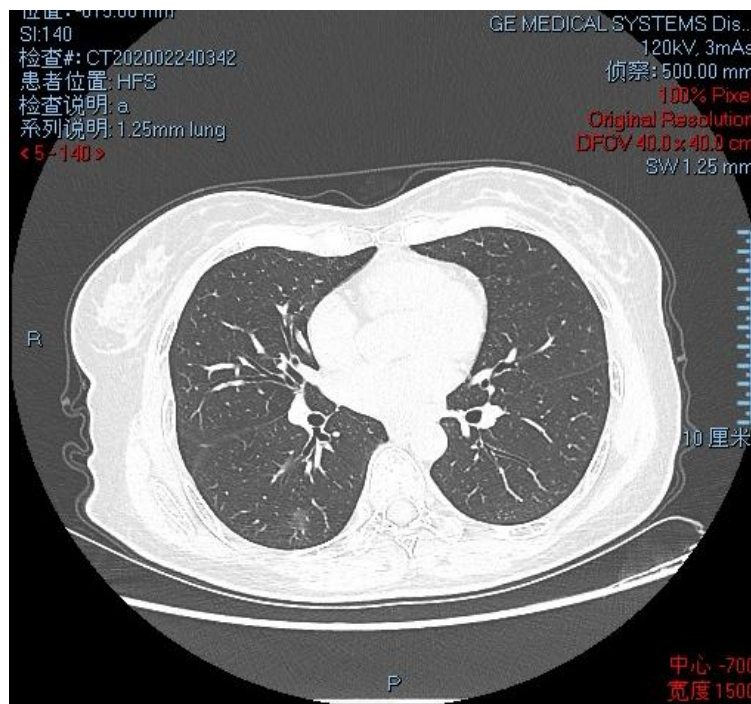

At 7 day

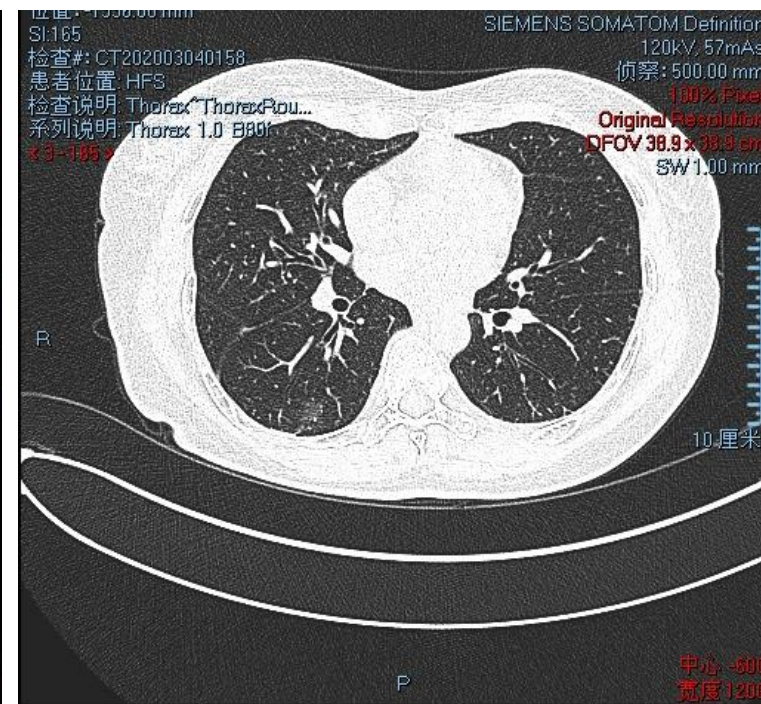

At 14 day



## Patient 18 Control group

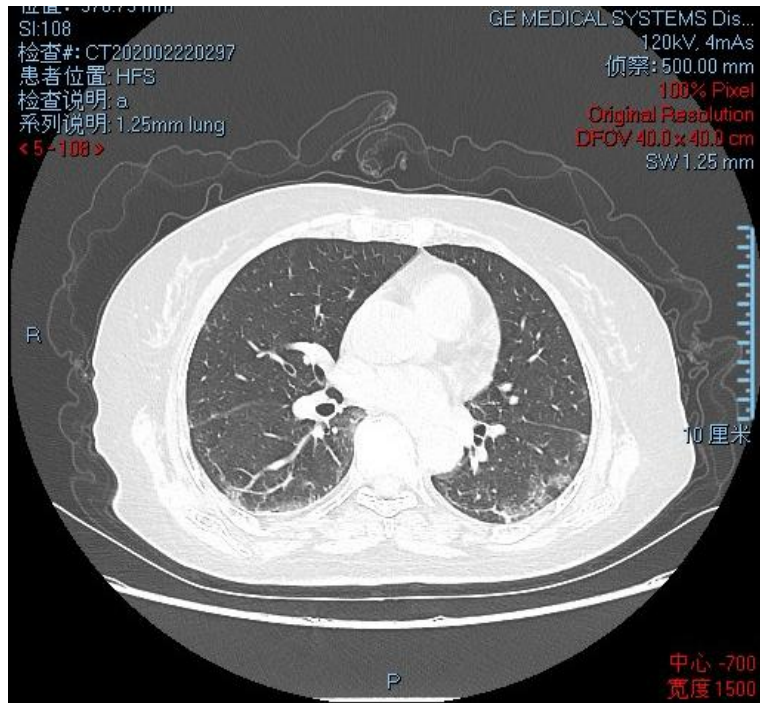

At admission

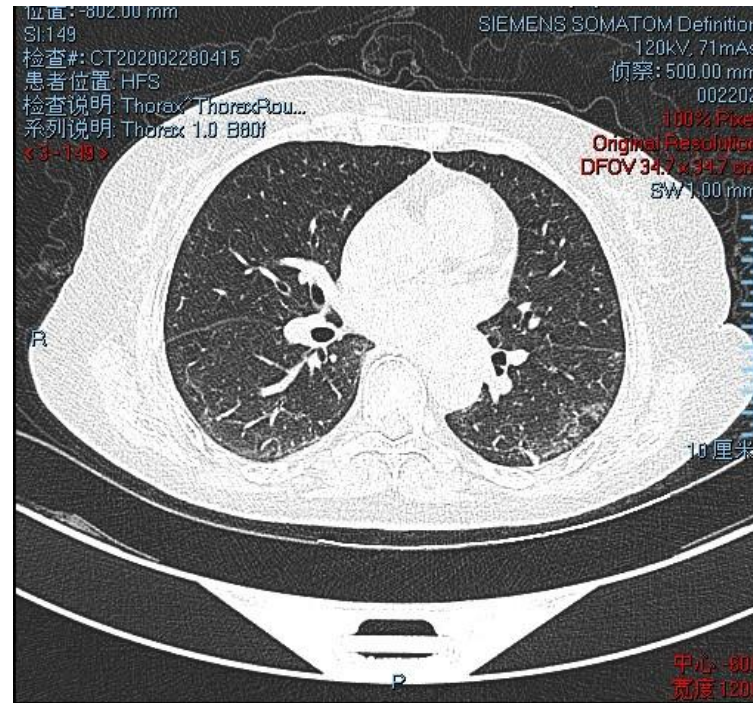

At 7 day

## Patient 19 Control group

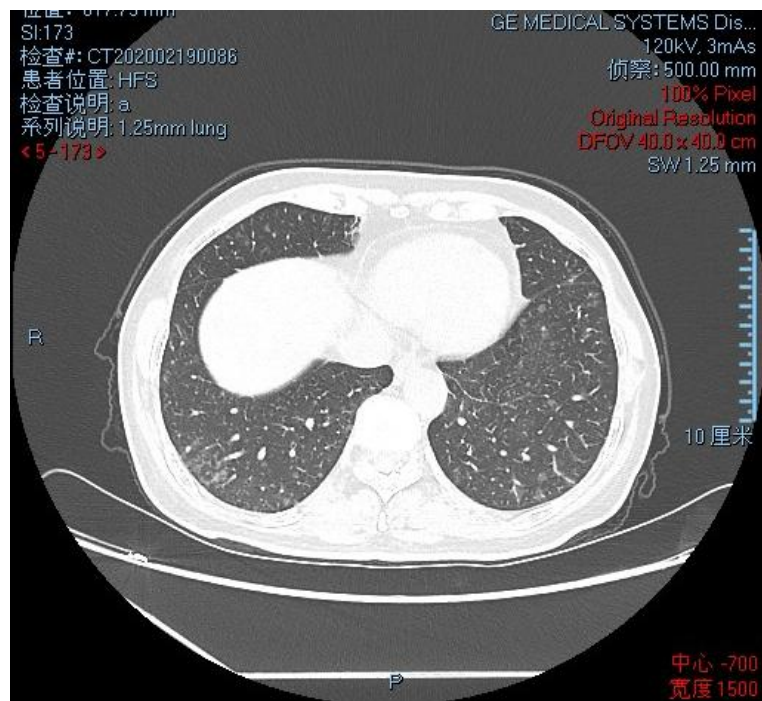

At admission

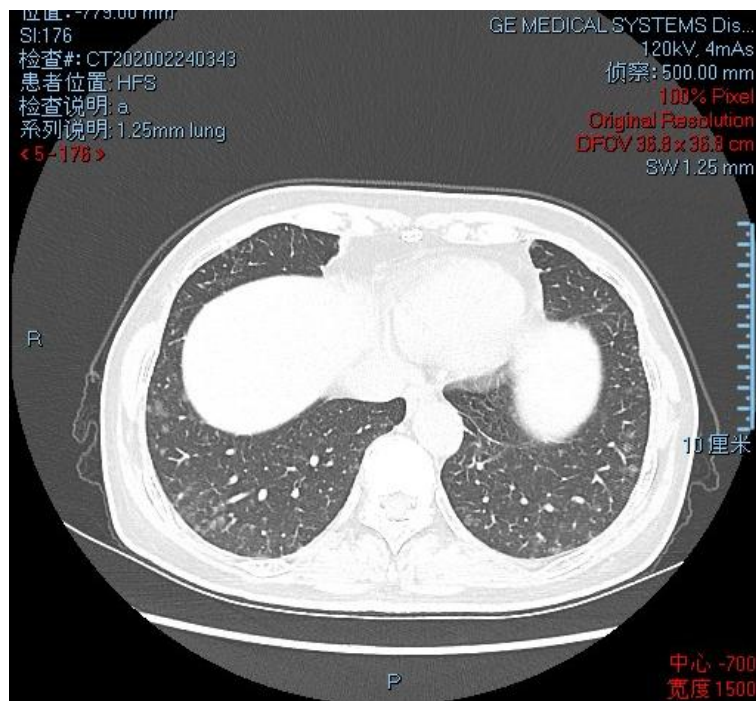

At 7 day

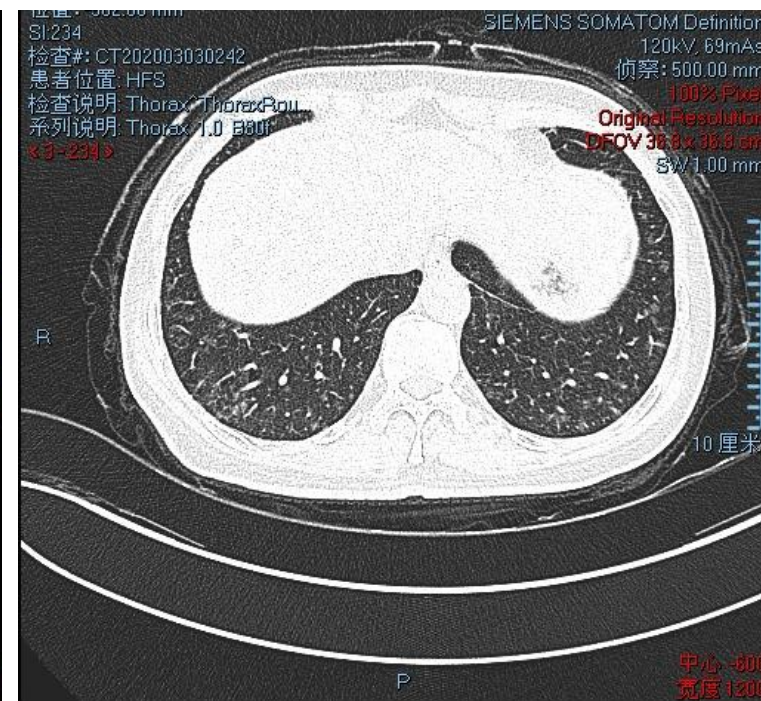

At 14 day



## Patient 20 Control group

On January 31, the patient was admitted to the hospital for pulmonary CT. Due to the deterioration of the patient's condition, the patient could only take bedside chest x-rays on February 14. After that, the patient's condition improved, and the CT scans were performed on February 29 and March 6.

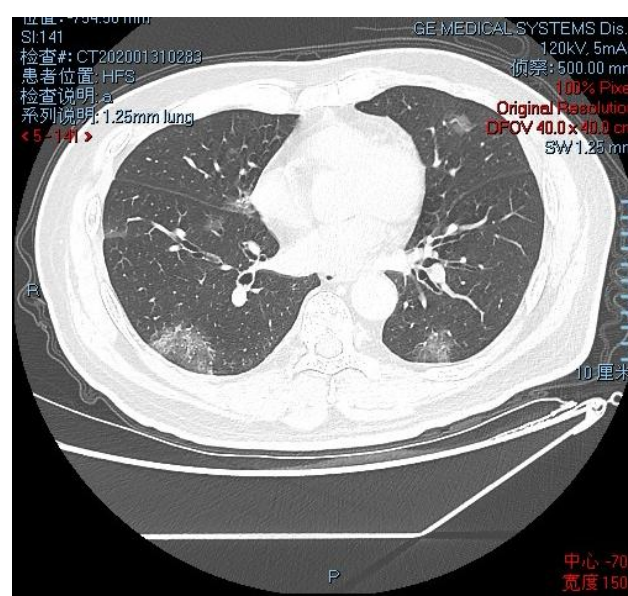

2020.01.31

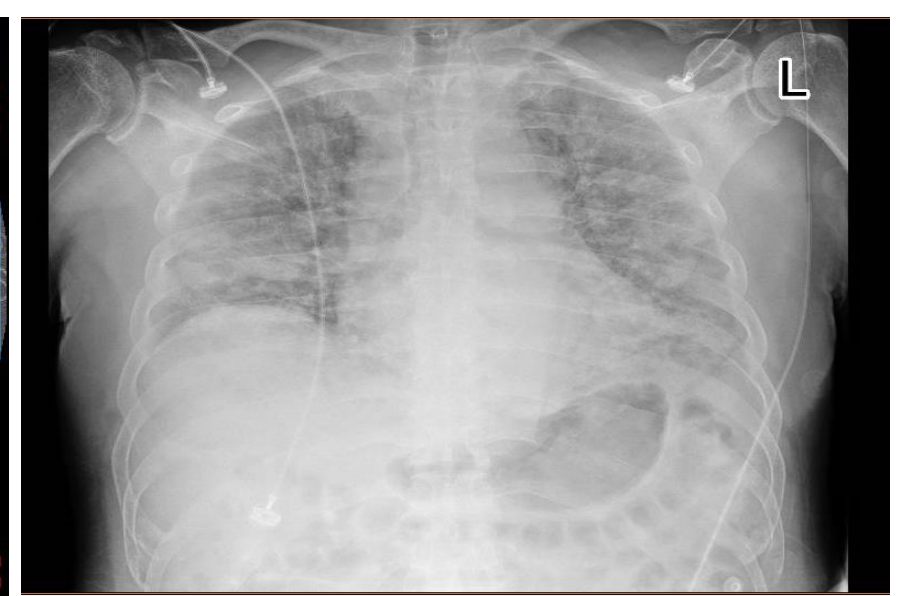

2020.02.14

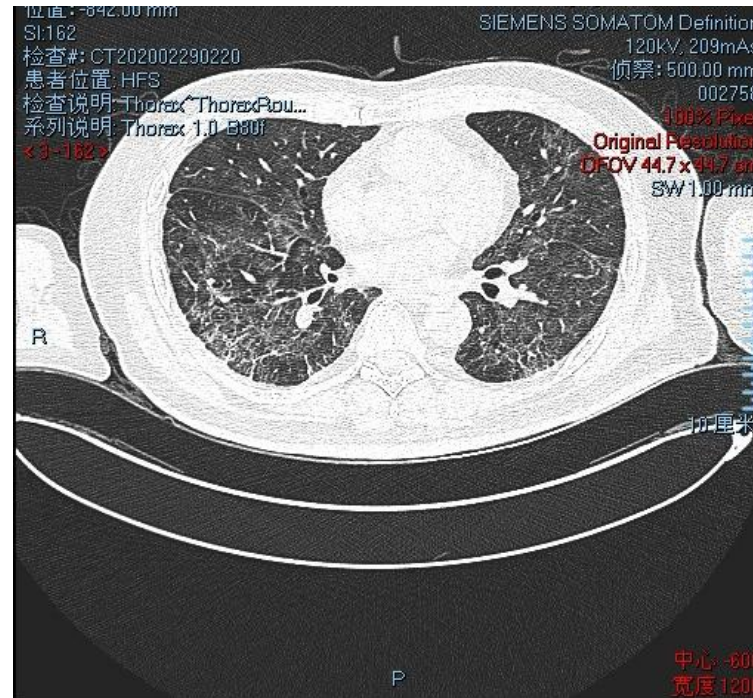

At 7 day(2020.02.29)

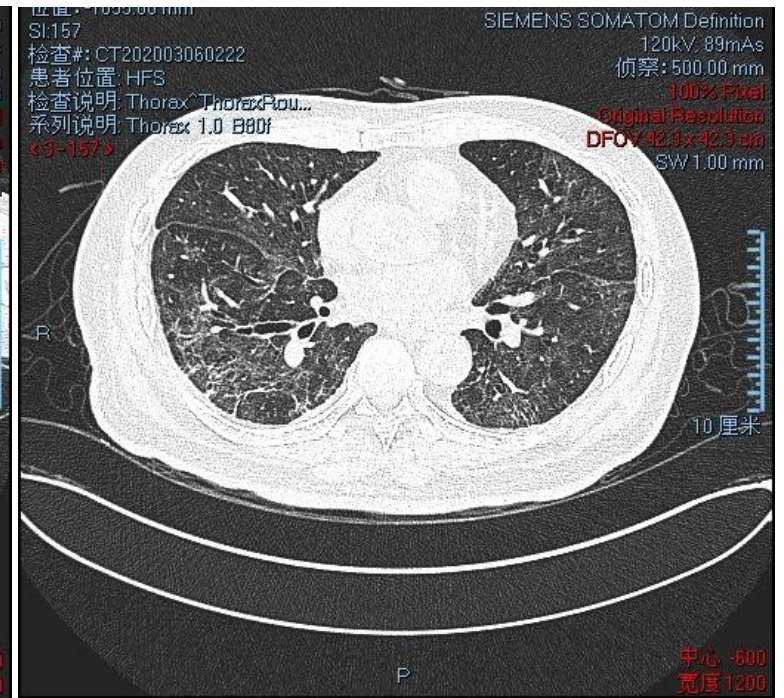

At 14 day(2020.03.06)



## Patient 21 Control group

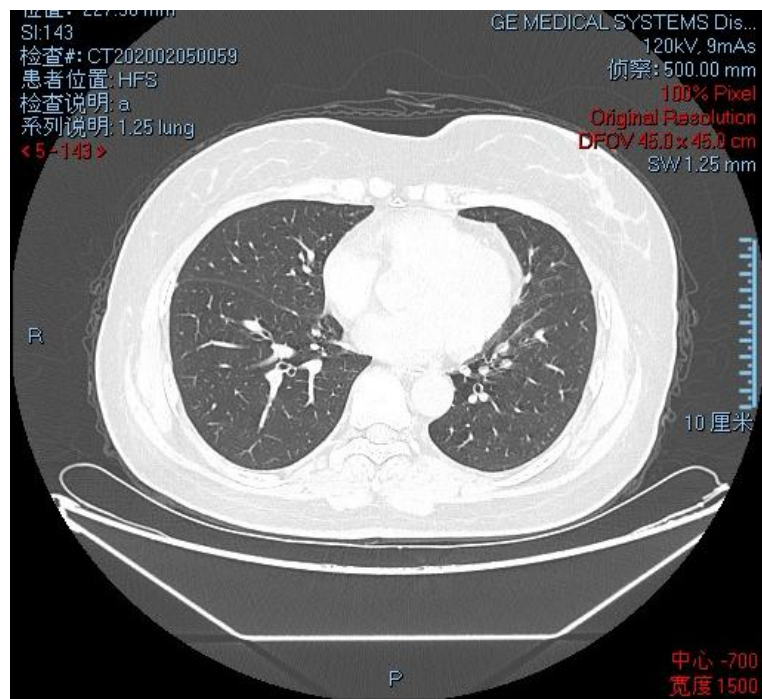

At admission

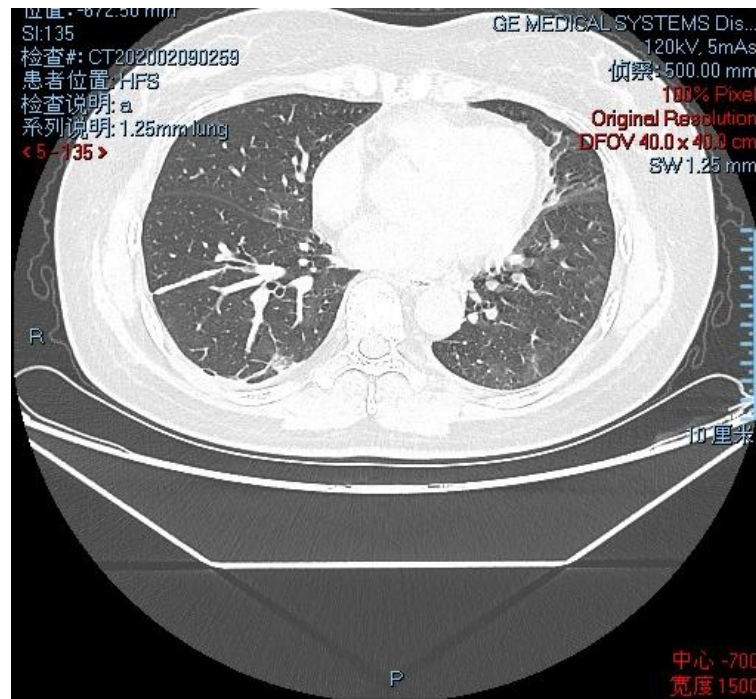

At 7 day

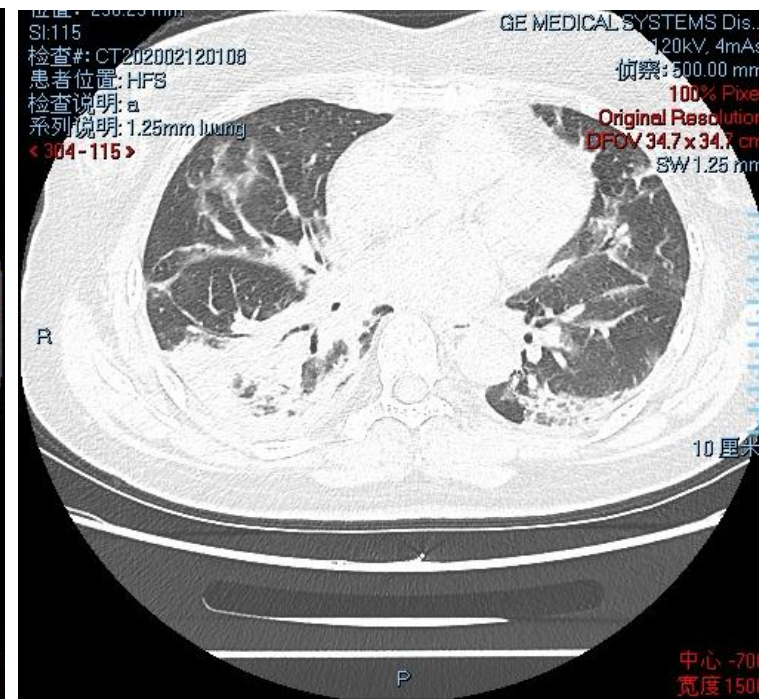

At 14 day
